# Supplementary material
Source: PubMed Central journal article supplement (PMC8425175)

# THE LANCET Oncology

## Supplementary appendix

This appendix formed part of the original submission and has been peer reviewed. We post it as supplied by the authors.

Supplement to: Casal MA, Ivy SP, Beumer J, Nolin TD. Effect of removing race from glomerular filtration rate-estimating equations on anticancer drug dosing and eligibility: a retrospective analysis of National Cancer Institute phase 1 clinical trial participants. *Lancet Oncol* 2021; published online Aug 13. [http://dx.doi.org/10.1016/S1470-2045\(21\)00377-6](http://dx.doi.org/10.1016/S1470-2045(21)00377-6).

SUPPLEMENTARY MATERIAL

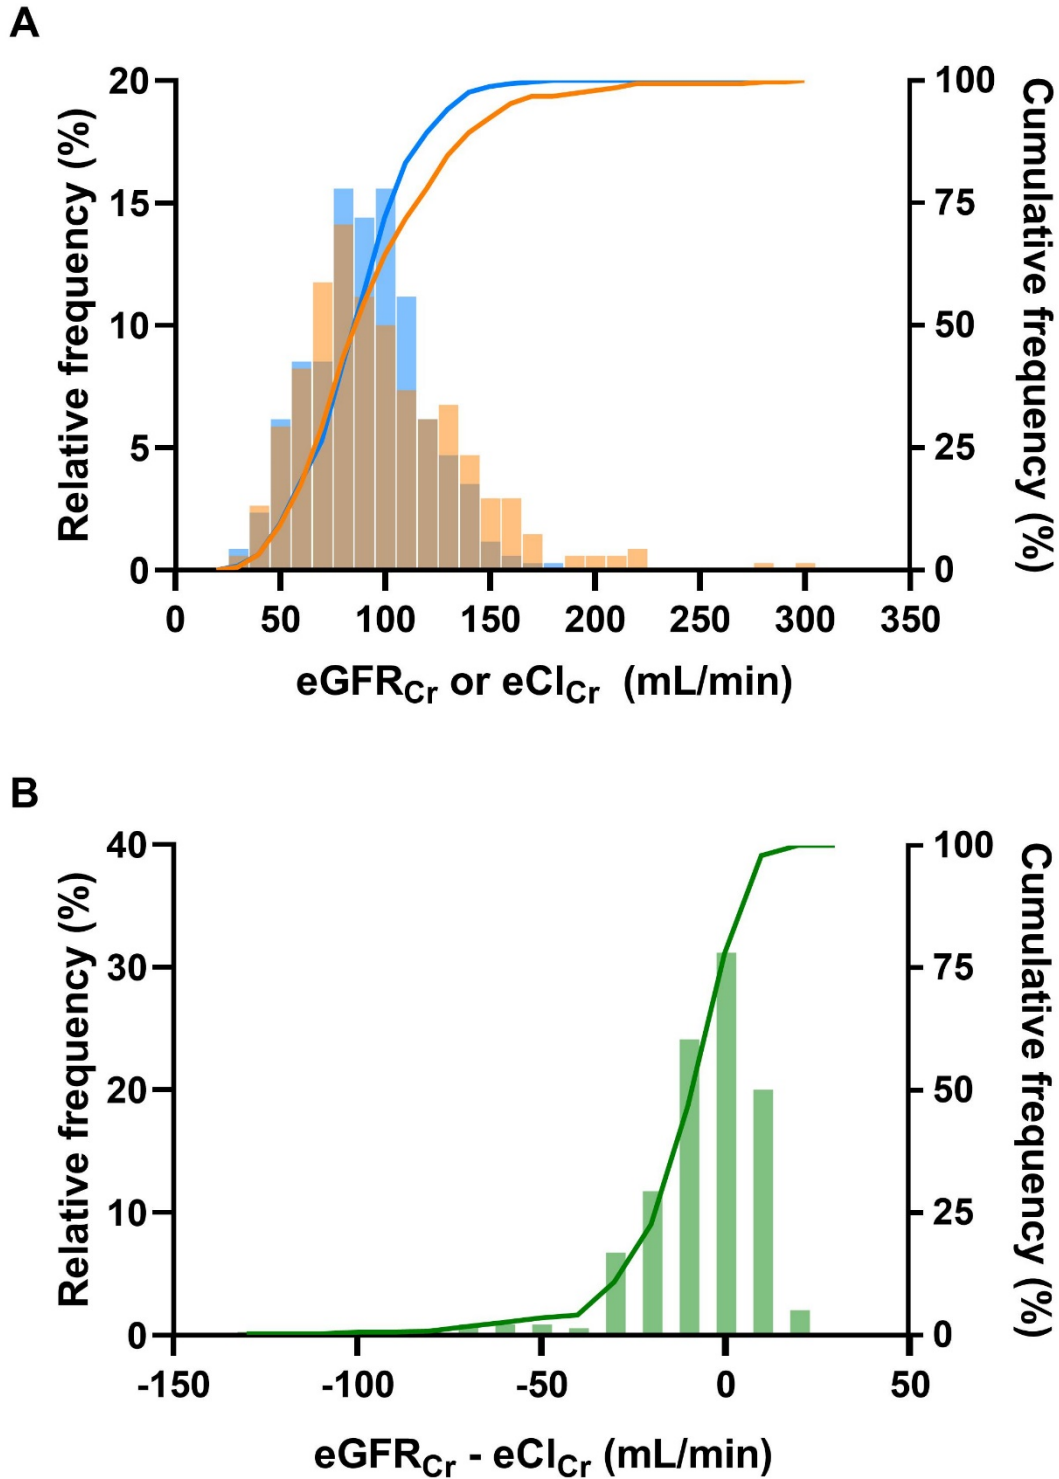

**Figure e1.** (A) eCl<sub>Cr</sub> estimated by CG (orange) and eGFR<sub>Cr</sub> calculated by CKD-EPI<sub>without race</sub> (blue) and (B) the difference of eGFR<sub>Cr</sub> - eCl<sub>Cr</sub> (green) was calculated for 340 black patients with cancer.

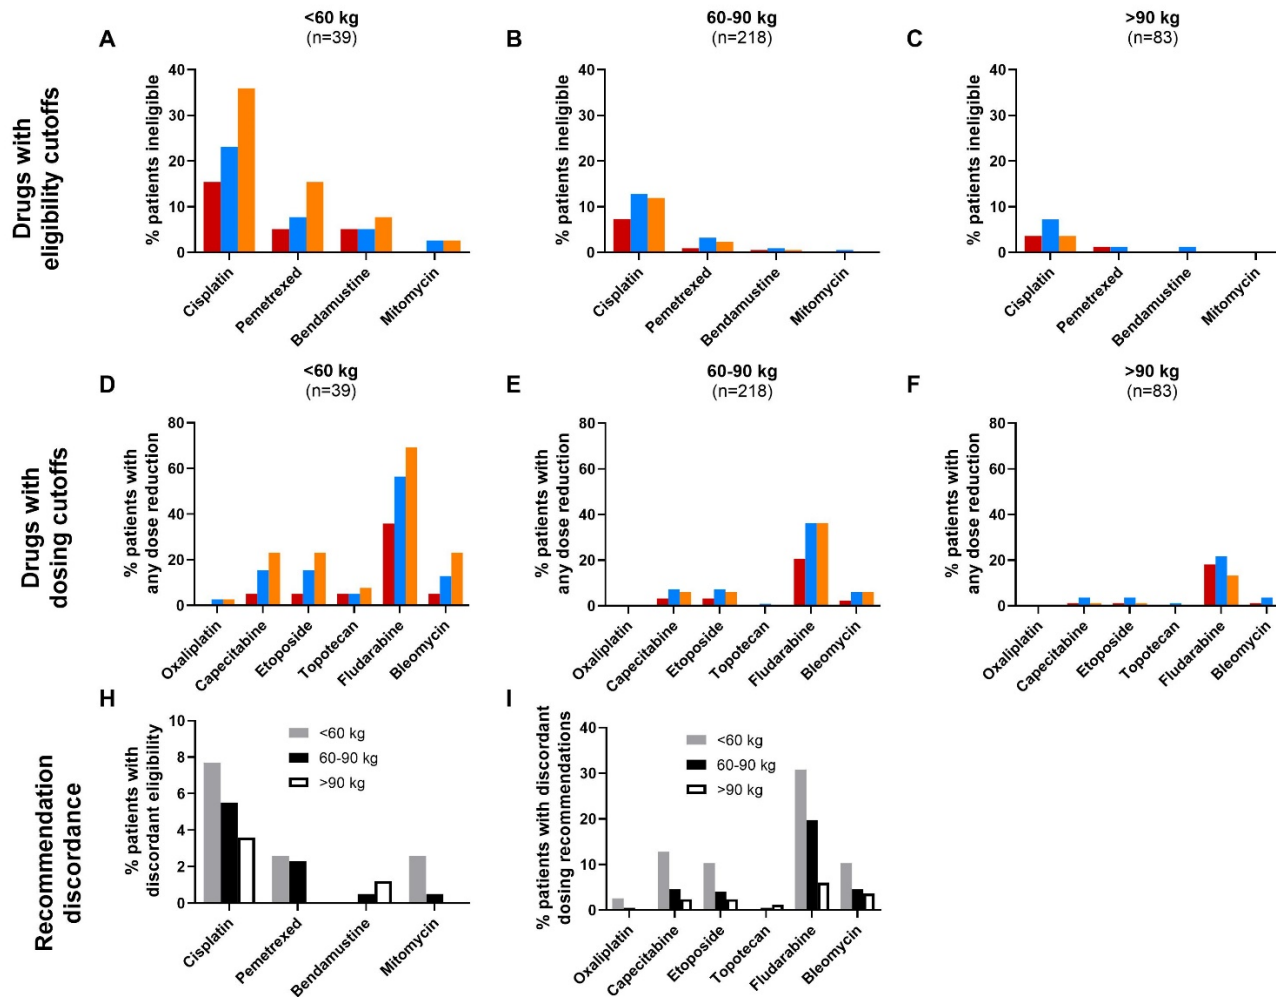

**Figure e2. Weight subgroup analyses for drug eligibility and dosing.** Dosing simulations were performed for anticancer drugs with (A-C) renal eligibility cutoffs and (D-F) renal dosing recommendations for subgroups based on the following weight: <60kg (A,D), 60-90 kg (B,E), and >90 kg (C,F). The percentage of patients ineligible for therapy because of renal eligibility criteria or requiring a renal dose reduction was calculated based on  $eGFR_{Cr}$  calculated by CKD-EPI (red) and CKD-EPI<sub>without race</sub> (blue) or  $eCl_{Cr}$  calculated by CG (orange). The percent of patients with (H) eligibility or (I) dosage discordance between CKD-EPI and CKD-EPI<sub>without race</sub> was calculated by weight subgroup.

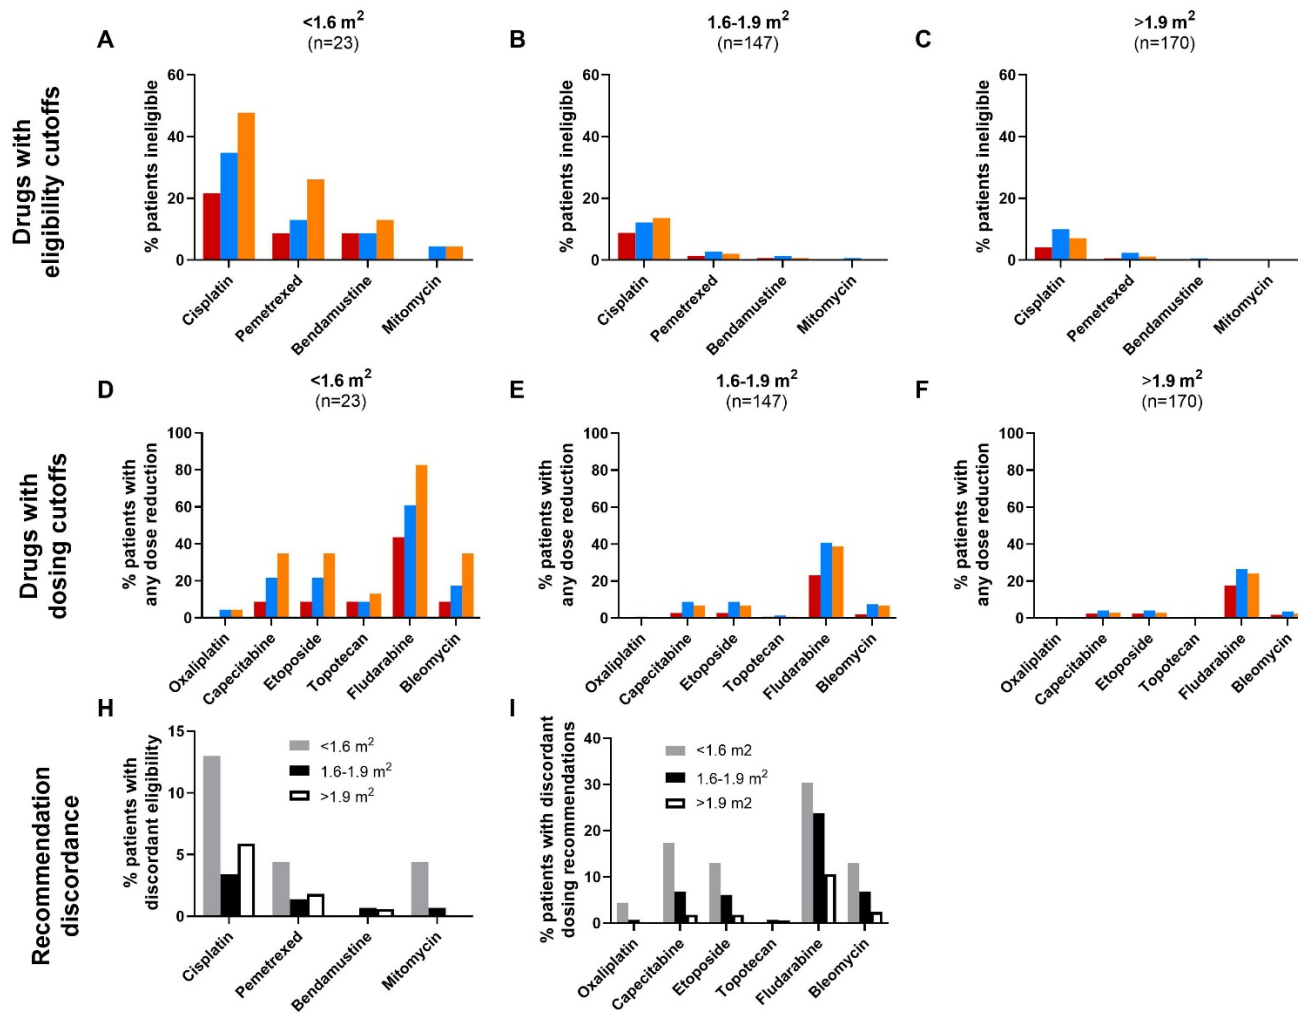

**Figure e3. BSA subgroup analyses for drug eligibility and dosing.** Dosing simulations were performed for anticancer drugs with (A-C) renal eligibility cutoffs and (D-F) renal dosing recommendations for subgroups based on the following BSAs:  $<1.6 \text{ m}^2$  (A,D),  $1.6\text{-}1.9 \text{ m}^2$  (B,E),  $>1.9 \text{ m}^2$  (C,F). The percentage of patients ineligible for therapy because of renal eligibility criteria or requiring a renal dose reduction was calculated based on  $e\text{GFR}_{\text{Cr}}$  calculated by CKD-EPI (red) and  $\text{CKD-EPI}_{\text{without race}}$  (blue) or  $e\text{Cl}_{\text{Cr}}$  calculated by CG (orange). The percent of patients with (H) eligibility or (I) dosage discordance between CKD-EPI and  $\text{CKD-EPI}_{\text{without race}}$  was calculated by BSA subgroup.

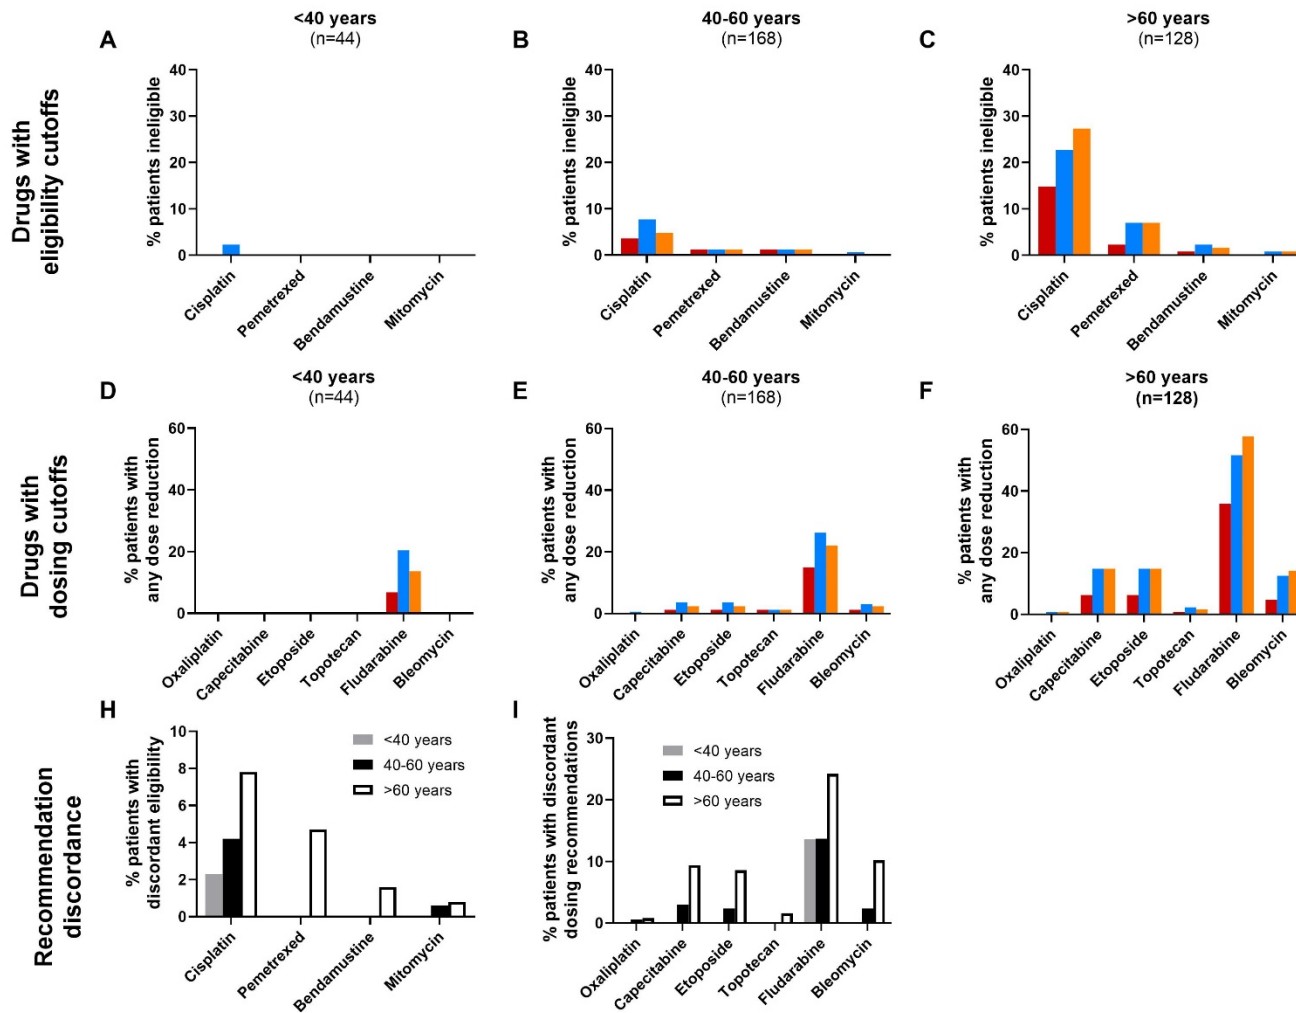

**Figure e4. Age subgroup analyses for drug eligibility and dosing.** Dosing simulations were performed for anticancer drugs with (A-C) renal eligibility cutoffs and (D-F) renal dosing recommendations for subgroups based on the following ages: <40 years (A,D), 40-60 years (B,E), and >60 years (C,F). The percentage of patients ineligible for therapy because of renal eligibility criteria or requiring a renal dose reduction was calculated based on  $eGFR_{Cr}$  calculated by CKD-EPI (red) and CKD-EPI<sub>without race</sub> (blue) or  $eCl_{Cr}$  calculated by CG (orange). The percent of patients with (H) eligibility or (I) dosage discordance between CKD-EPI and CKD-EPI<sub>without race</sub> was calculated by age subgroup.

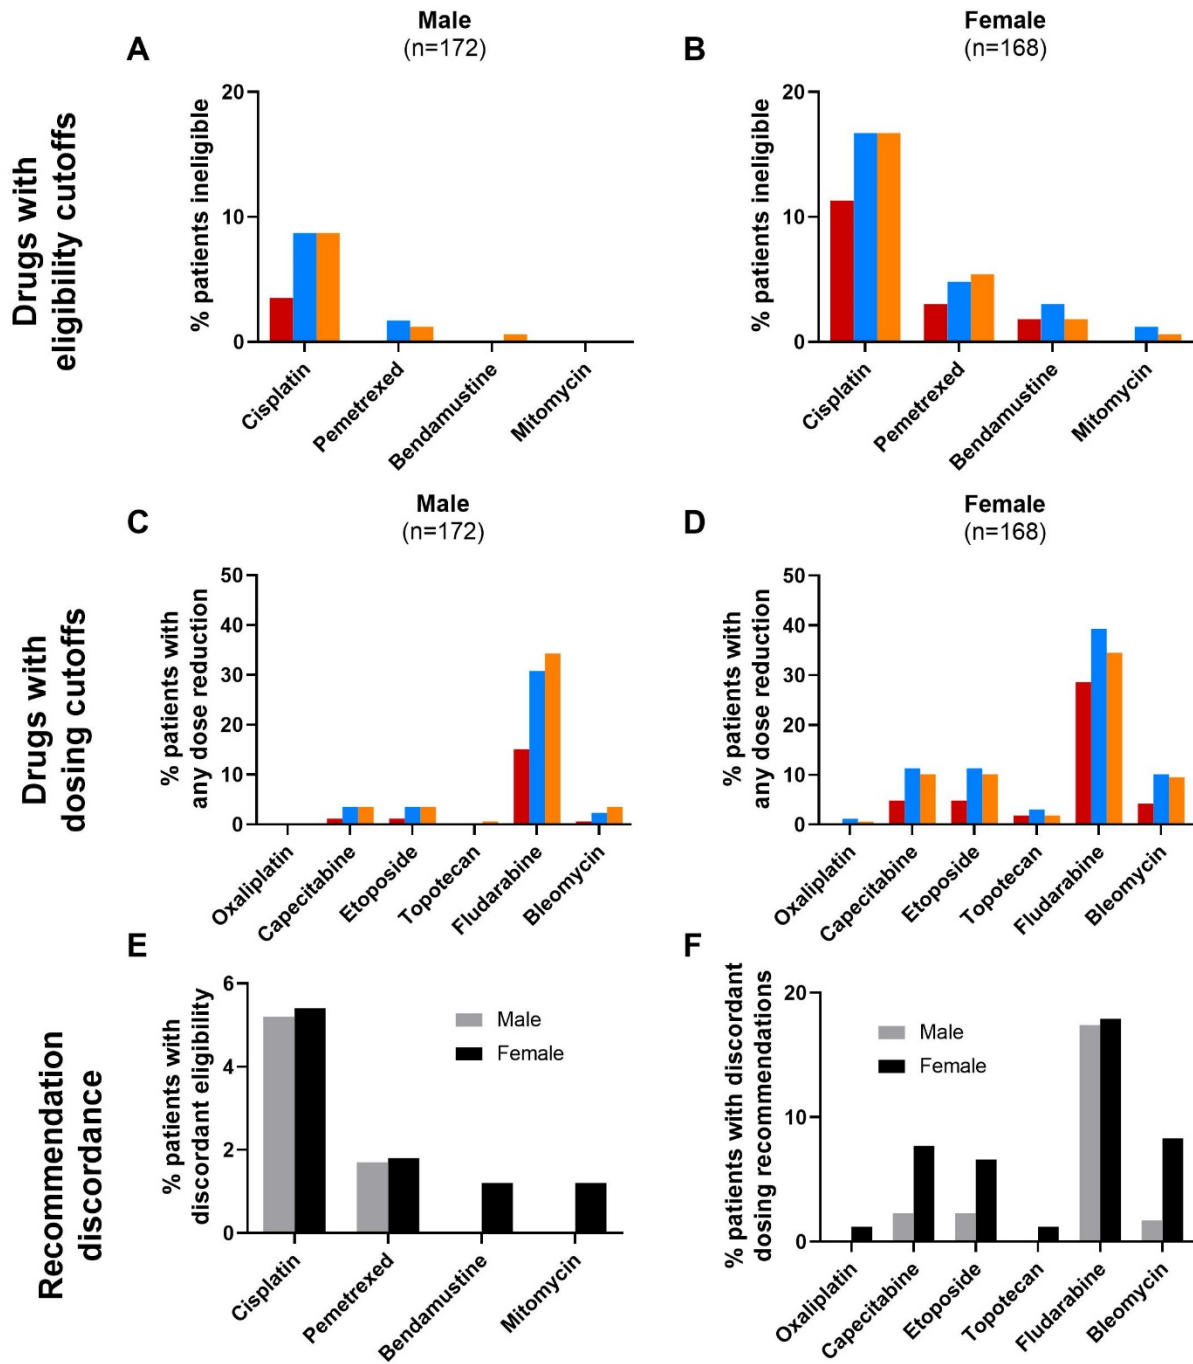

Supplement: NIHMS1735187-supplement-Supp_Materials.pdf [file NIHMS1735187-supplement-Supp_Materials.pdf]
